# Supplementary material for: Molecular epidemiology of Ascaris lumbricoides following multiple rounds of community-wide treatment
Source: Springer Nature journal article supplement (doi:10.1038/s41467-025-59316-x), 2025-05-09
Supplement: MOESM1 [file 41467_2025_59316_MOESM1_ESM.pdf]

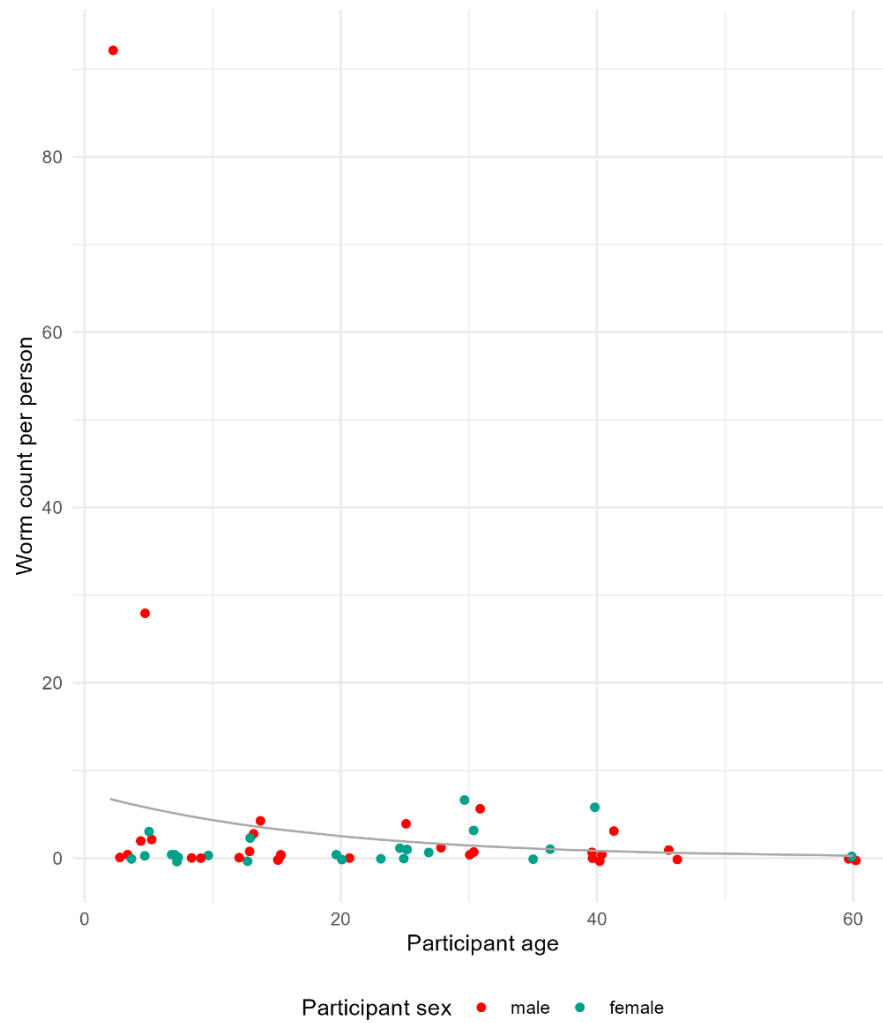

**Supplementary Figure 1:** Counts of worms expelled through chemo expulsion. Increasing age is displayed across the  $x$ -axis and worm count per individual is displayed in the  $y$ -axis. The worm count is the sum of total number of worms collected across five days following albendazole ingestion

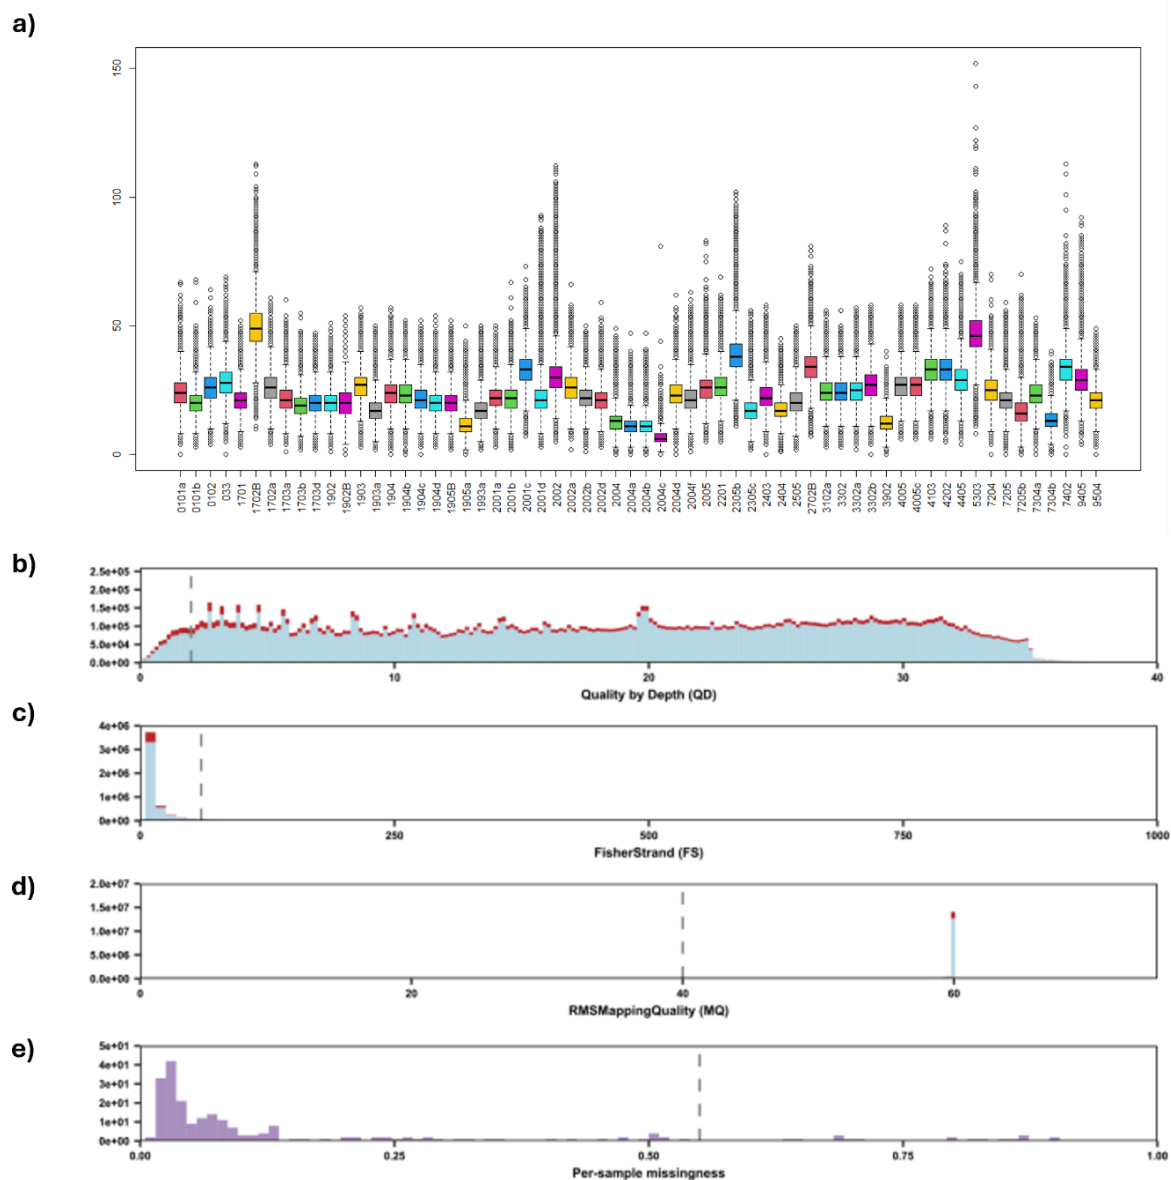

**Supplementary Figure 2: Variant quality control.** Plot a shows the mean depth of coverage per sample. Plots b and c show the frequency distribution of mapping values throughout the 3,692,001 variants. Plots d and e show the frequency distribution of per-sample missingness (samples with a high rate of per-site variant missingness) and per-site (sites with a high proportion of variant missingness) missingness after filtering using thresholds. Vertical dashed lines show the thresholds applied for the removal of sites.

| K  | log(ml)       |
|----|---------------|
| 1  | -15005054.776 |
| 2  | -1497772.129  |
| 3  | -14800534.39  |
| 4  | -1492882.662  |
| 5  | -1506327.448  |
| 6  | -1508411.942  |
| 7  | -1513480.551  |
| 8  | -1518480.551  |
| 9  | -1519967.927  |
| 10 | -1521112.44   |
| 11 | -1533352.44   |
| 12 | -1551002.44   |
| 13 | -1553228.58   |
| 14 | -1554773.25   |
| 15 | -1554997.114  |
| 16 | -1560001.287  |
| 17 | -1565551.88   |
| 18 | -15633147.11  |
| 19 | -1577821.02   |
| 20 | -1580357.13   |

**Supplementary Figure 3: Log maximum likelihood values** calculated by BAPS for 1-10 putative populations (K) across the full filtered dataset ( $n = 54$ )

| Data set        | n  | H <sub>o</sub> (±StdErr) | H <sub>e</sub> (±StdErr) | Pi (±StdErr)     | F <sub>is</sub> (±StdErr) | N <sub>e</sub> (95% C.I.) |
|-----------------|----|--------------------------|--------------------------|------------------|---------------------------|---------------------------|
| Total dataset   | 54 | 0.212<br>(0.001)         | 0.405<br>(0.001)         | 0.395<br>(0.001) | -0.121<br>(-0.077)        | 81.6 (67.1–95.1)          |
| Age groups      |    |                          |                          |                  |                           |                           |
| Pre-SAC         | 9  | 0.207 (0.023)            | 0.251 (0.026)            | 0.352 (0.026)    | -0.168 (-0.048)           | 88.2 (54.8 – 121.6)       |
| SAC             | 18 | 0.200 (0.022)            | 0.260 (0.026)            | 0.264 (0.026)    | 0.221 (0.073)             | 135.6 (119.5 – 151.7)     |
| Adolescents     | 14 | 0.204 (0.024)            | 0.245 (0.027)            | 0.246 (0.027)    | -0.159 (-0.043)           | 45.2 (36.1 – 51.3)        |
| Adult           | 13 | 0.188<br>(0.029)         | 0.208<br>(0.031)         | 0.338<br>(0.029) | -0.099<br>(-0.088)        | 57.35<br>(40.9 – 64.1)    |
| Compliance      |    |                          |                          |                  |                           |                           |
| Fully Compliant | 8  | 0.103<br>(0.001)         | 0.121<br>(0.005)         | 0.127<br>(0.003) | -0.157<br>(-0.055)        | 29.9 (21.3 – 38.2)        |
| Semi-compliant  | 11 | 0.199<br>(0.005)         | 0.287<br>(0.005)         | 0.329<br>(0.002) | 0.210<br>(0.029)          | 98.5 (80.7 – 106.3)       |
| Non-compliant   | 31 | 0.279<br>(0.055)         | 0.375<br>(0.039)         | 0.377<br>(0.009) | 0.255<br>(0.087)          | 121.3 (115.8 – 136.8)     |

**Supplementary Figure 4: Population genetic indices across dataset.** This table describes the population genetic indices across the sampled community. It is disaggregated via age grouping and drug compliance throughout Ho, He, Pi, Fis and Ne for each group.

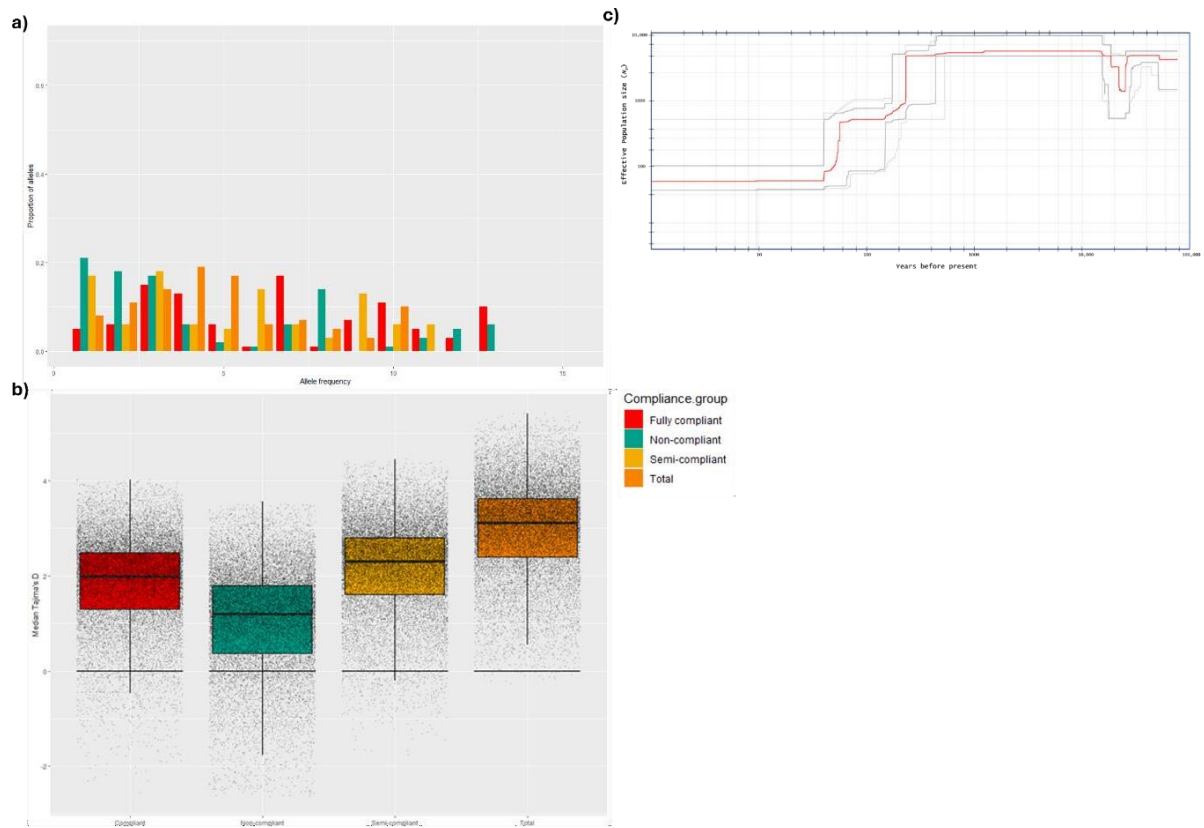

**Supplementary Figure 5:** **a** One-dimensional site frequency spectra for each parasite population according to drug compliance assignment. The *x*-axis represents the derived allele frequency and the *y*-axis represents the proportion of sites at each allele frequency. **b** Median Tajima's D values calculated in 5 kb windows across each autosome for each compliance group. For all boxplots the central line indicates the median the top and bottom edges of the box indicate the 25<sup>th</sup> and 75<sup>th</sup> percentiles, respectively, the maximum whisker lengths are specified as 1.5 times the interquartile range. **c** Demographic history change within the Korke Doge population

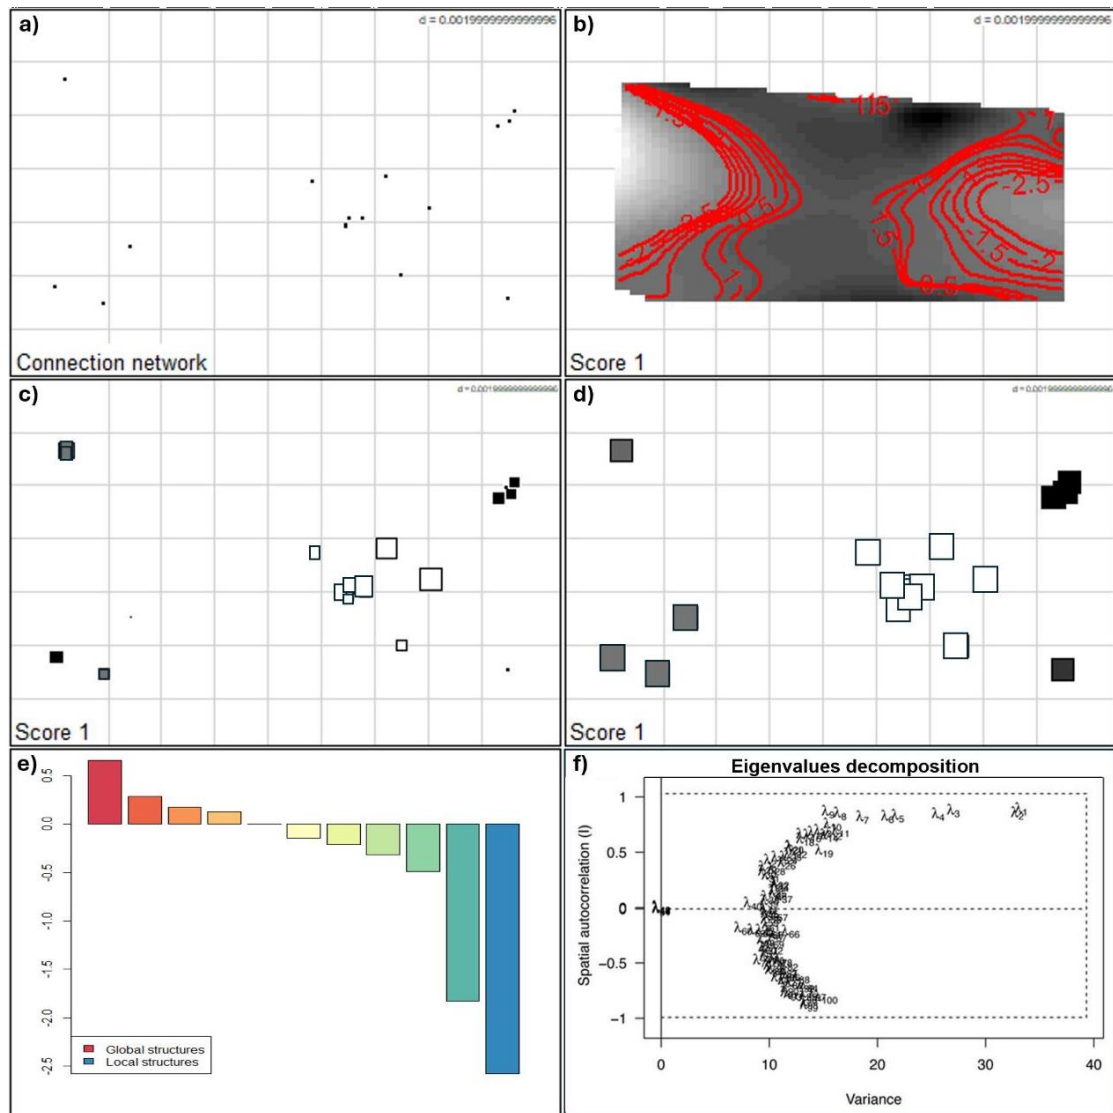

**Supplementary Figure 6: Spatial Principal Component analysis:** **a.** represents the points used in the connection network that was used to define spatial weightings. **b-d** plots representing the first eigenvector scores in space, **b** showing a contour plot representing the plotting of  $\lambda_1$  local scores, the closer the contour lines the greater level of genetic differentiation is in space. **c** plotting the local scores in greyscale, large black squares are well differentiated from large white squares, small squares are less well differentiated from each other. **d** This plot is a variant on grey levels. All three plots taken in the round indicate that three genetic clusters exist in three genetic clusters. **e** plot represented the local and global score eigenvectors. **f** Represents eigenvalues of sPCA denoted  $\lambda_i$  with  $i = 1, \dots, r$ , where  $\lambda_1$  is the highest positive eigenvalue, and  $\lambda_r$  is the highest negative eigenvalue according to the variance and Morans's  $I$  components

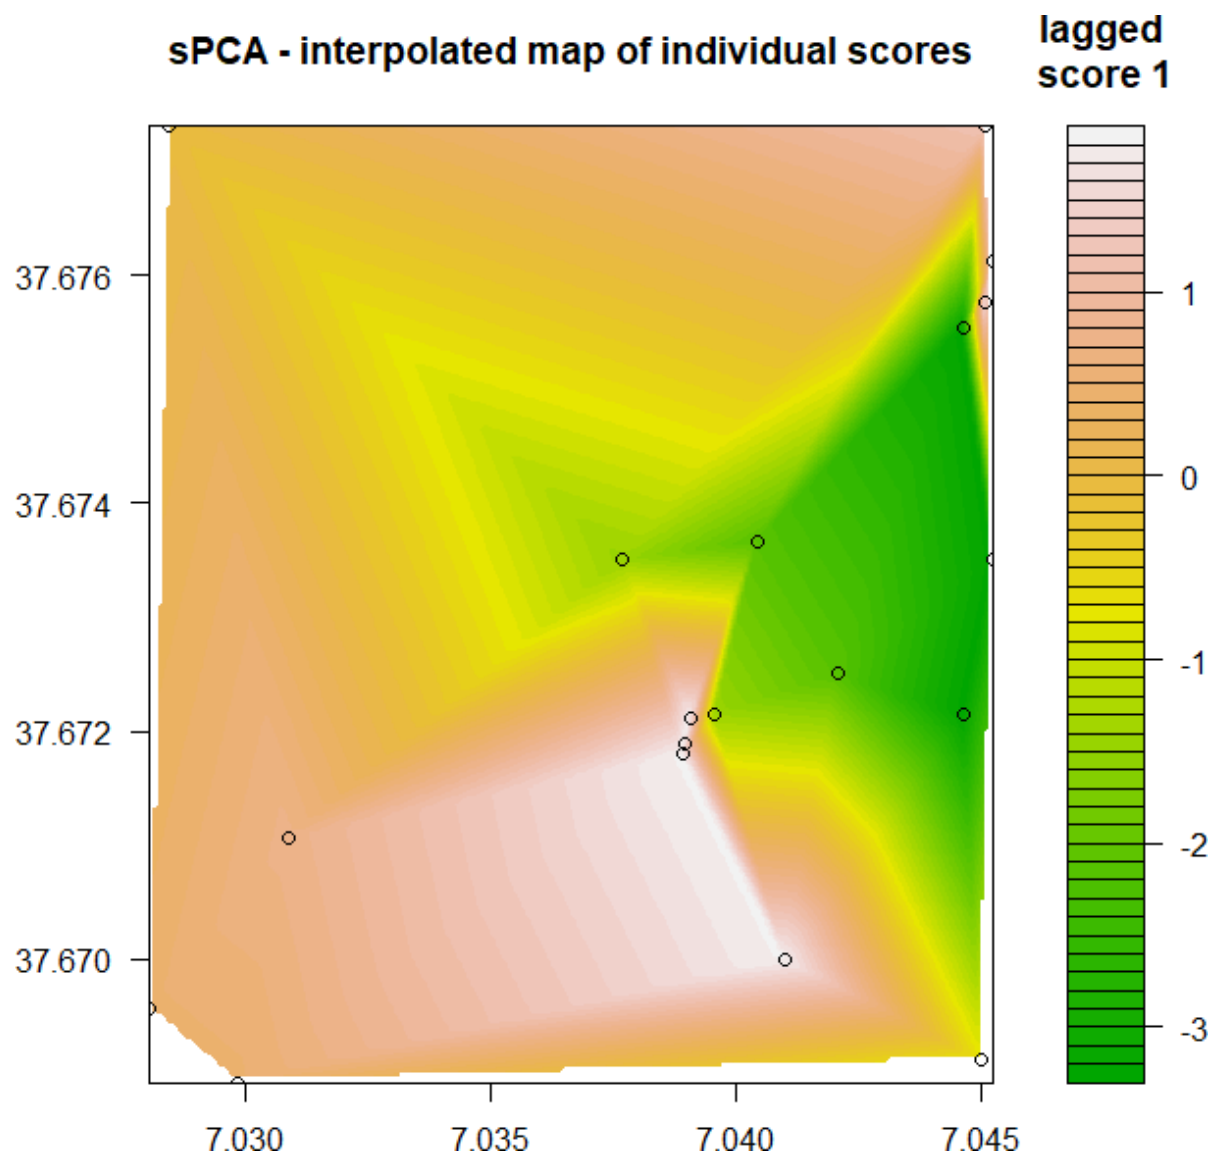

**Supplementary Figure 7:** Interpolated map; map of principal components onto geographic space. To achieve better resolution the lagged scores have been plotted on specific interpolated coordinates. Each circle represents a sampled household

a)

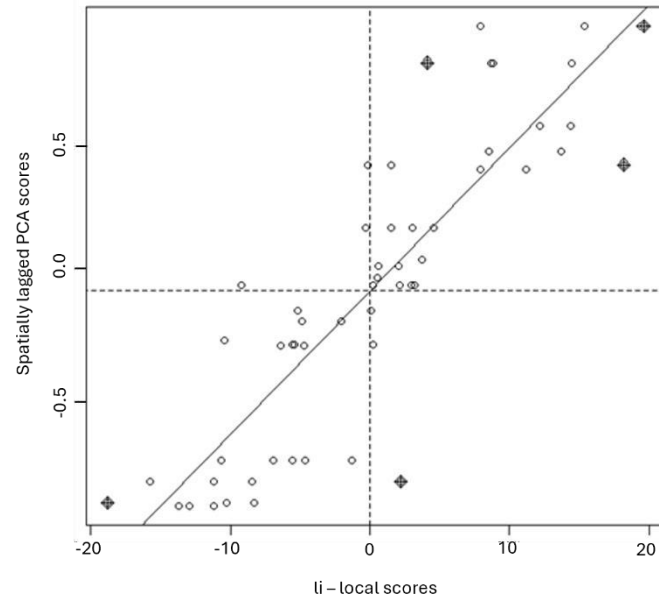

b)

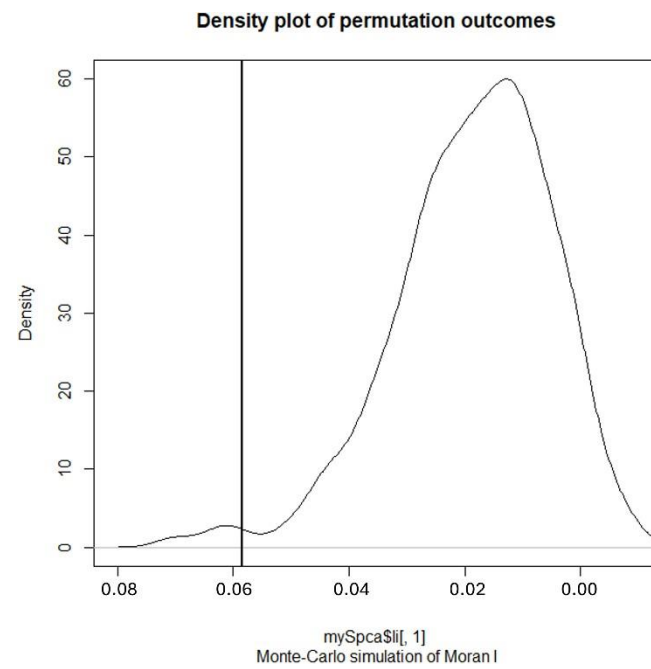

**Supplementary Figure 8: a.** Negative autocorrelation outcome plot between spatial variable and its lag factor. **b.** Density plot of Moran's I posterior scores



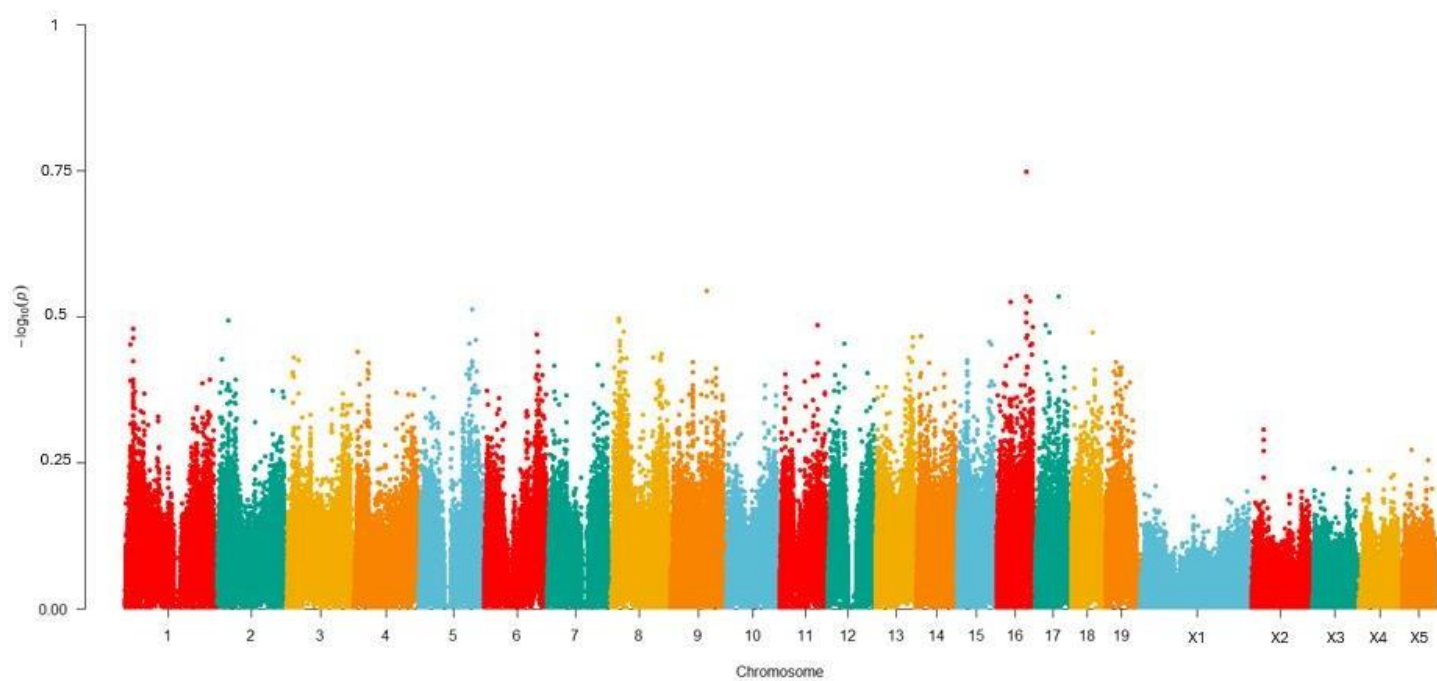

**Supplementary Figure 9:** Genome-wide plot of genetic diversity (Pi) from all individuals within the dataset
